# Supplementary material for: Multifaceted bundle interventions shown effective in reducing VAP rates in our multidisciplinary ICUs
Source: PubMed Central journal article supplement — BMJ Qual Improv Rep. 2016 Apr 4;5(1):u205566.w2278. doi: 10.1136/bmjquality.u205566.w2278 (PMC4822021; doi:10.1136/bmjquality.u205566.w2278), 2016-04-04
Supplement: bmjqir-5-u205566-w2278-s1.pdf [file bmjqir-5-u205566-w2278-s1.pdf]

# Driver Diagram

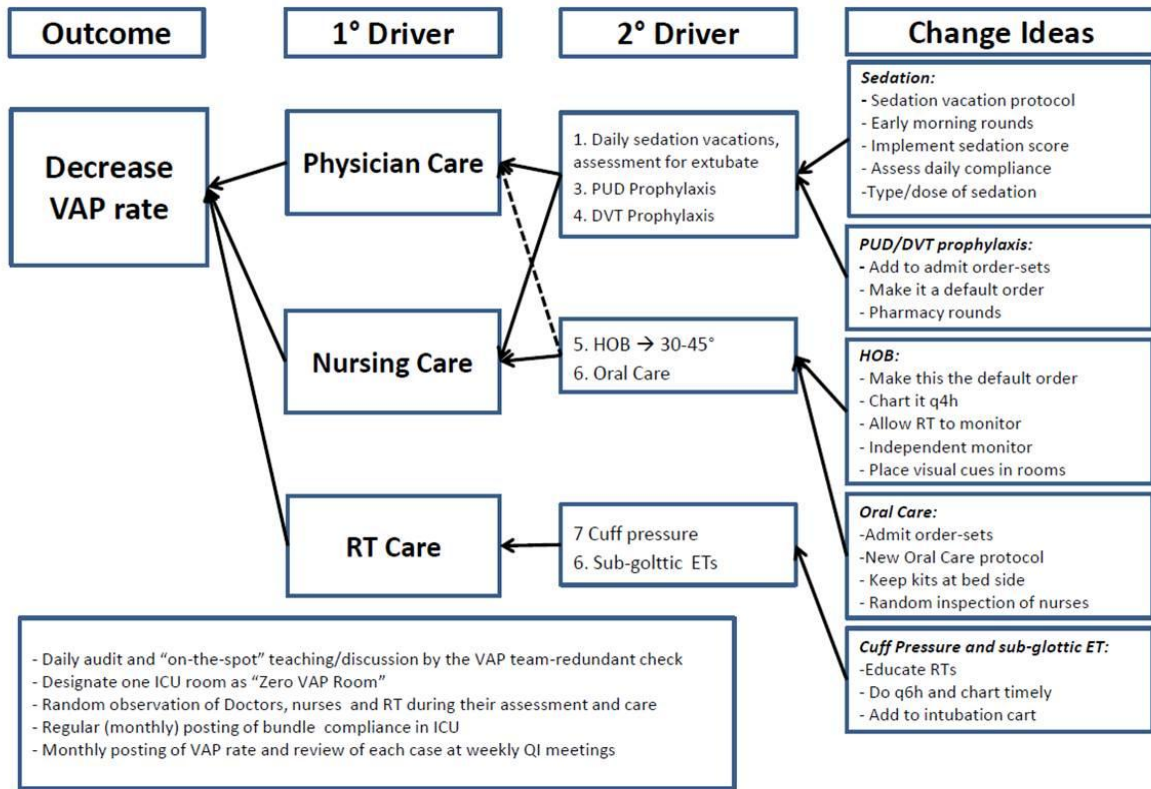

# Monthly- Critical Care Units

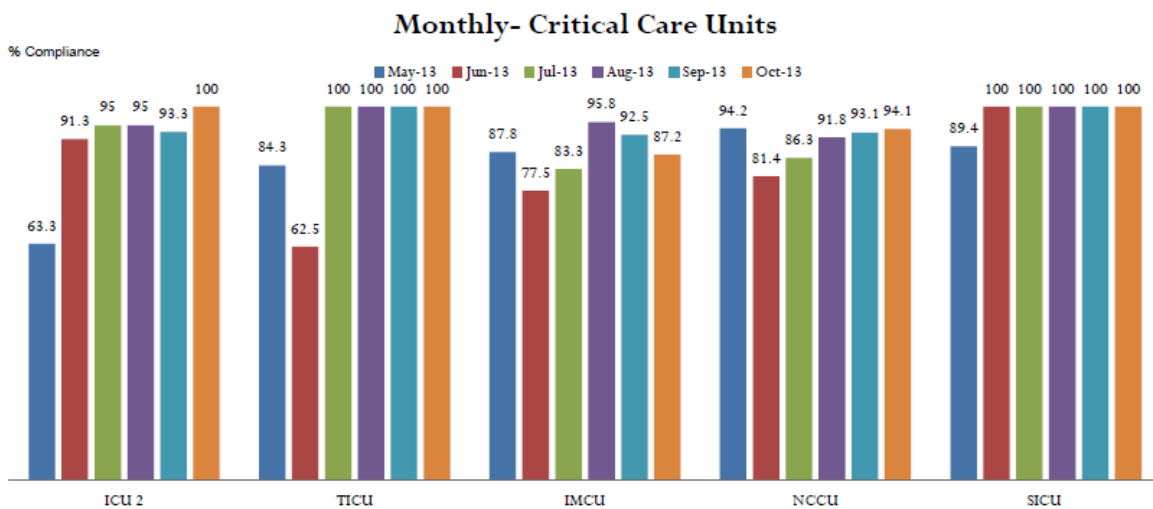

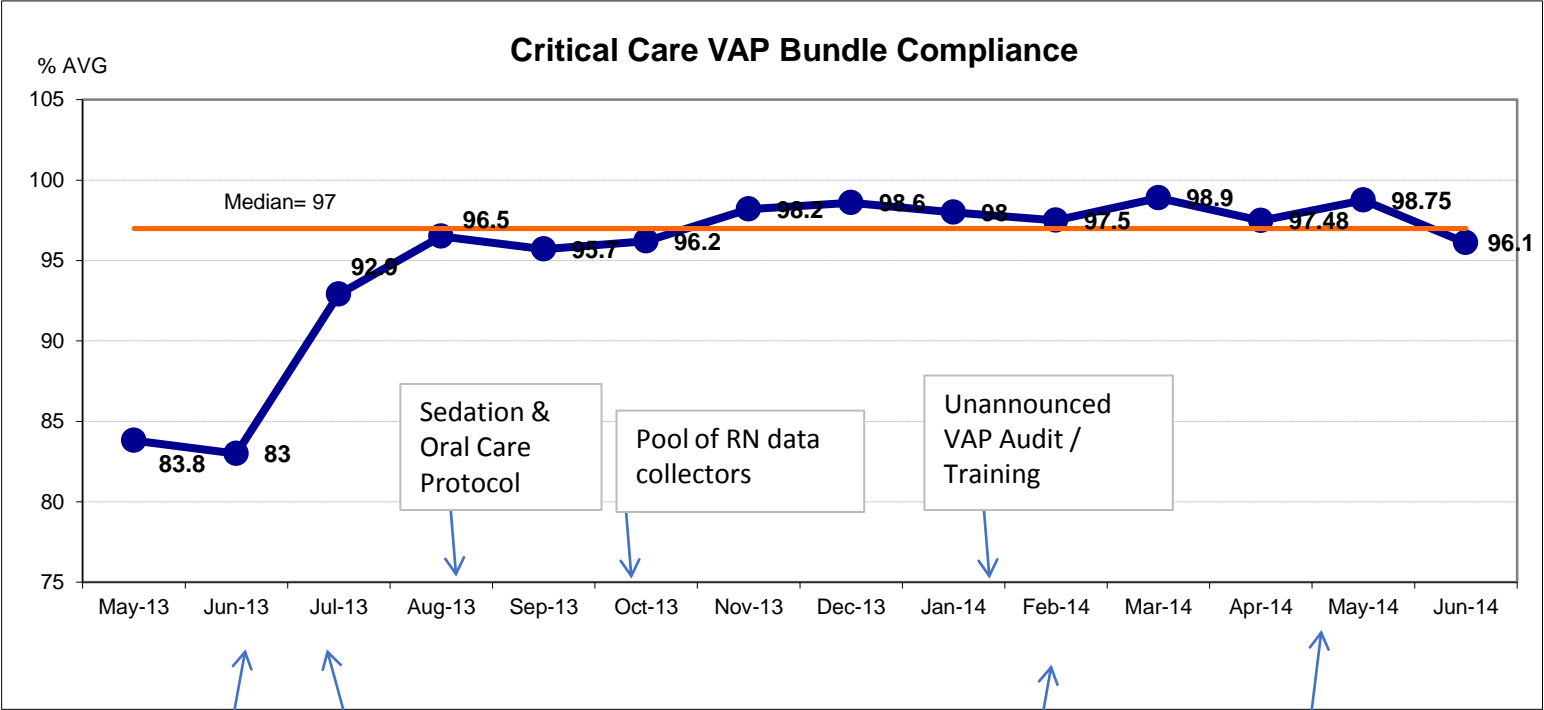

Spreading Improvement / Data Collection PDSA

One to One training about bundle and data collection / Nursing Inservice

Data Collection PDSA

VAP Awareness Week

### VAP Bundle Compliance VS. VAP Rate

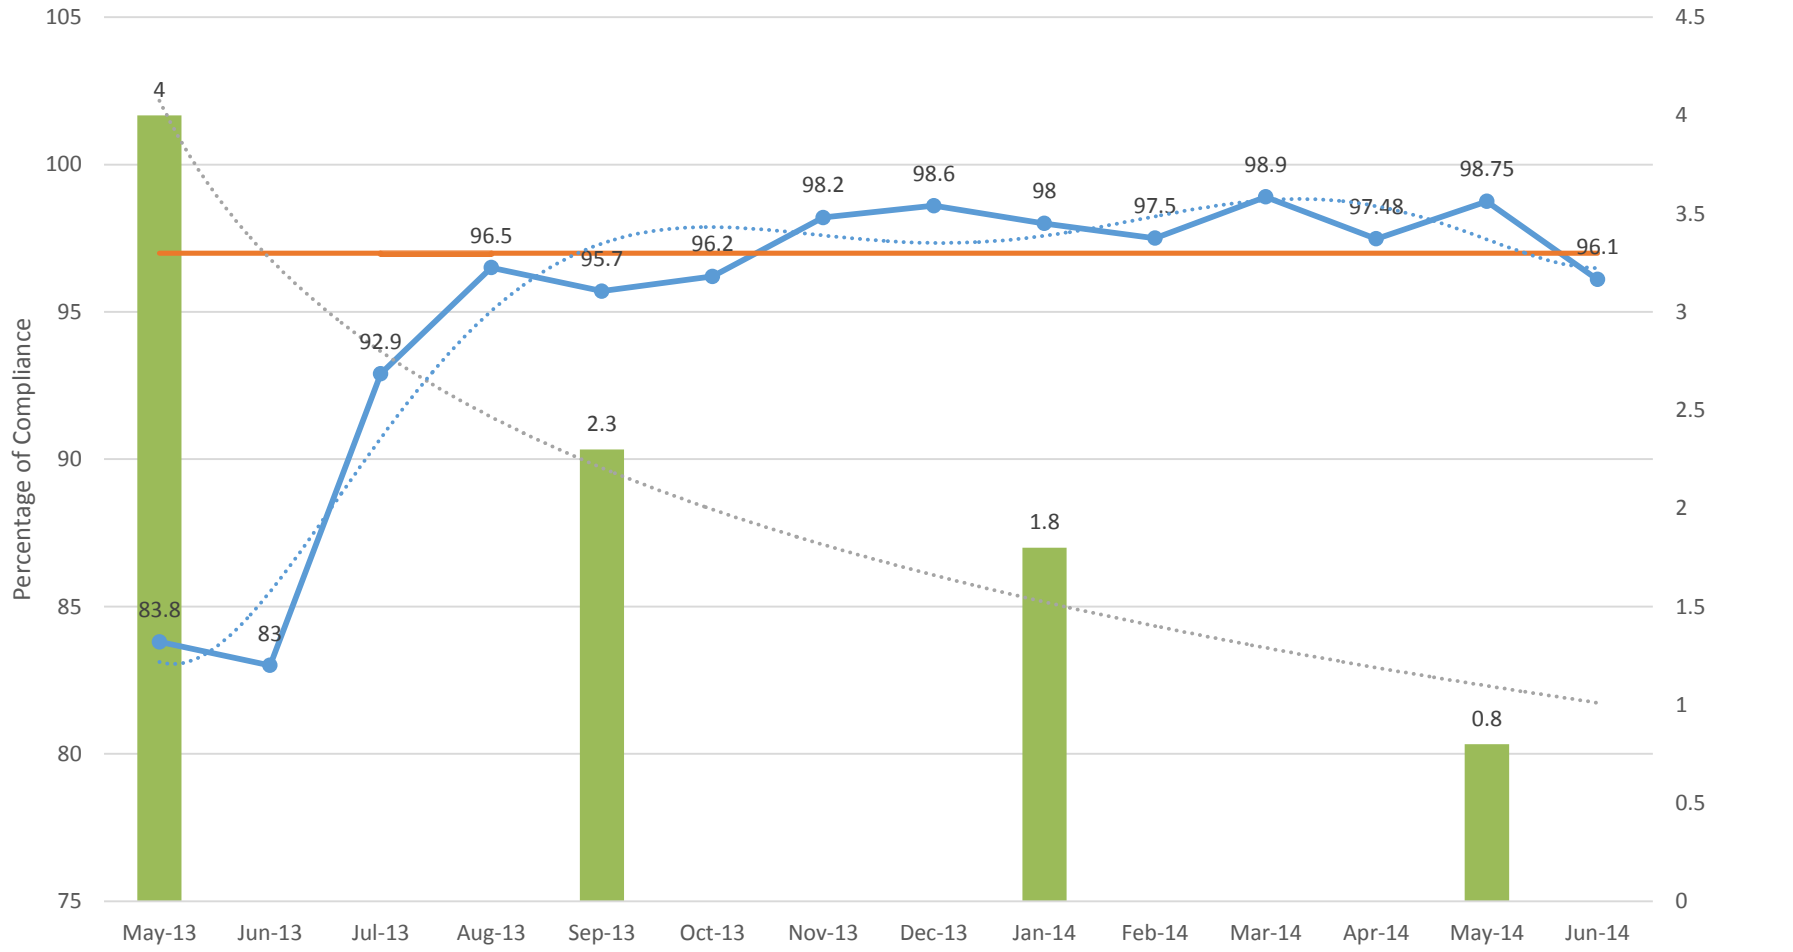

█ VAP rate     
 —●— Bundle Compliance     
 — Median     
 ⋯ Log. (VAP rate)     
 ⋯ Poly. (Bundle Compliance)

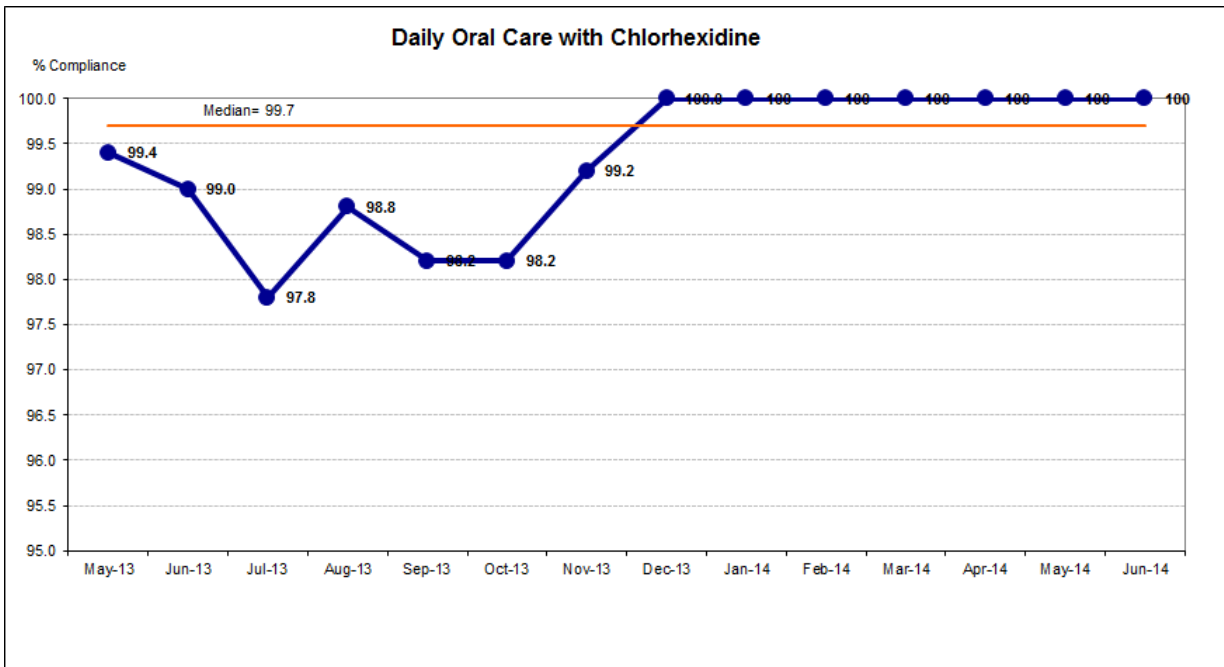

Example of Individual element of the bundle compliance for all the ICUs.

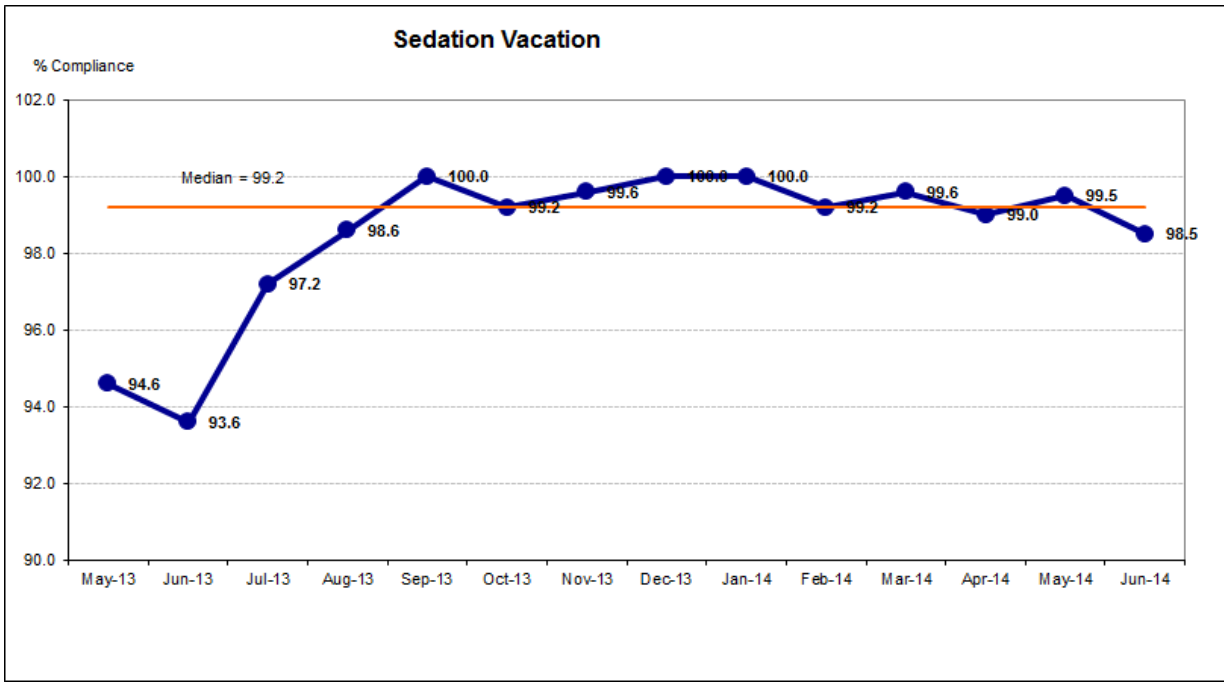

# Monthly- Critical Care Units

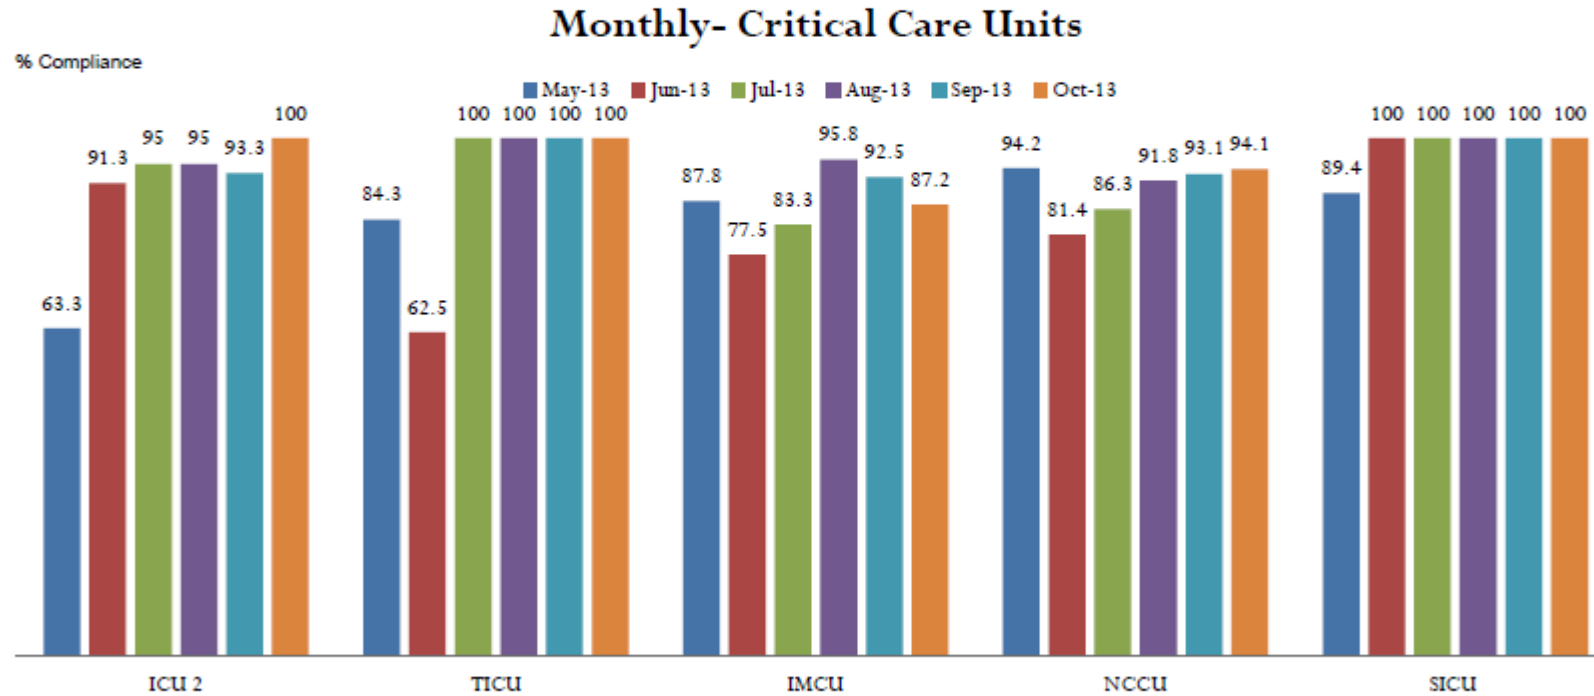

ICU2 - General ICU / TICU- Trauma ICU / IMCU- Intermediate ICU / NCCU- Neuro ICU / SICU - Surgical ICU

# VAP Project - Using the NHS Sustainability Model

Sustainability (Total Score= 66)

|              | Factor                                                       | Factor Level | Score      | Max Score   | GAP        |
|--------------|--------------------------------------------------------------|--------------|------------|-------------|------------|
| Process      | Benefits beyond helping patients                             | A            | 8.5        | 8.5         | 0          |
|              | Credibility of the evidence                                  | A            | 9.1        | 9.1         | 0          |
|              | Adaptability of improved process                             | A            | 7          | 7.0         | 0          |
|              | Effectiveness of the system to monitor progress              | B            | 3.3        | 6.5         | 3.2        |
| Staff        | <b>Staff involvement and training to sustain the process</b> | <b>B</b>     | <b>6.3</b> | <b>11.4</b> | <b>5.1</b> |
|              | Staff behaviours toward sustaining the change                | A            | 11         | 11.0        | 0          |
|              | <b>Senior leadership engagement</b>                          | <b>B</b>     | <b>6.2</b> | <b>15.0</b> | <b>8.8</b> |
|              | <b>Clinical leadership engagement</b>                        | <b>B</b>     | <b>6.7</b> | <b>15.0</b> | <b>8.3</b> |
| Organization | Fit with the organization's strategic aims and culture       | B            | 3.5        | 7.0         | 3.5        |
|              | Infrastructure for sustainability                            | B            | 4.4        | 9.5         | 5.1        |

Using the NHS Sustainability model, we were able to visualize the gap we have to sustain the project, and we highlighted in bold the problematic areas that we addressed.

Calculate your total scores

|                            |    |       |
|----------------------------|----|-------|
| Process total score        | 21 |       |
|                            | +  |       |
| Staff total score          | 30 |       |
|                            | +  |       |
| Organisation total score   | 8  |       |
|                            | =  |       |
| Sustainability total score | 59 | Date: |

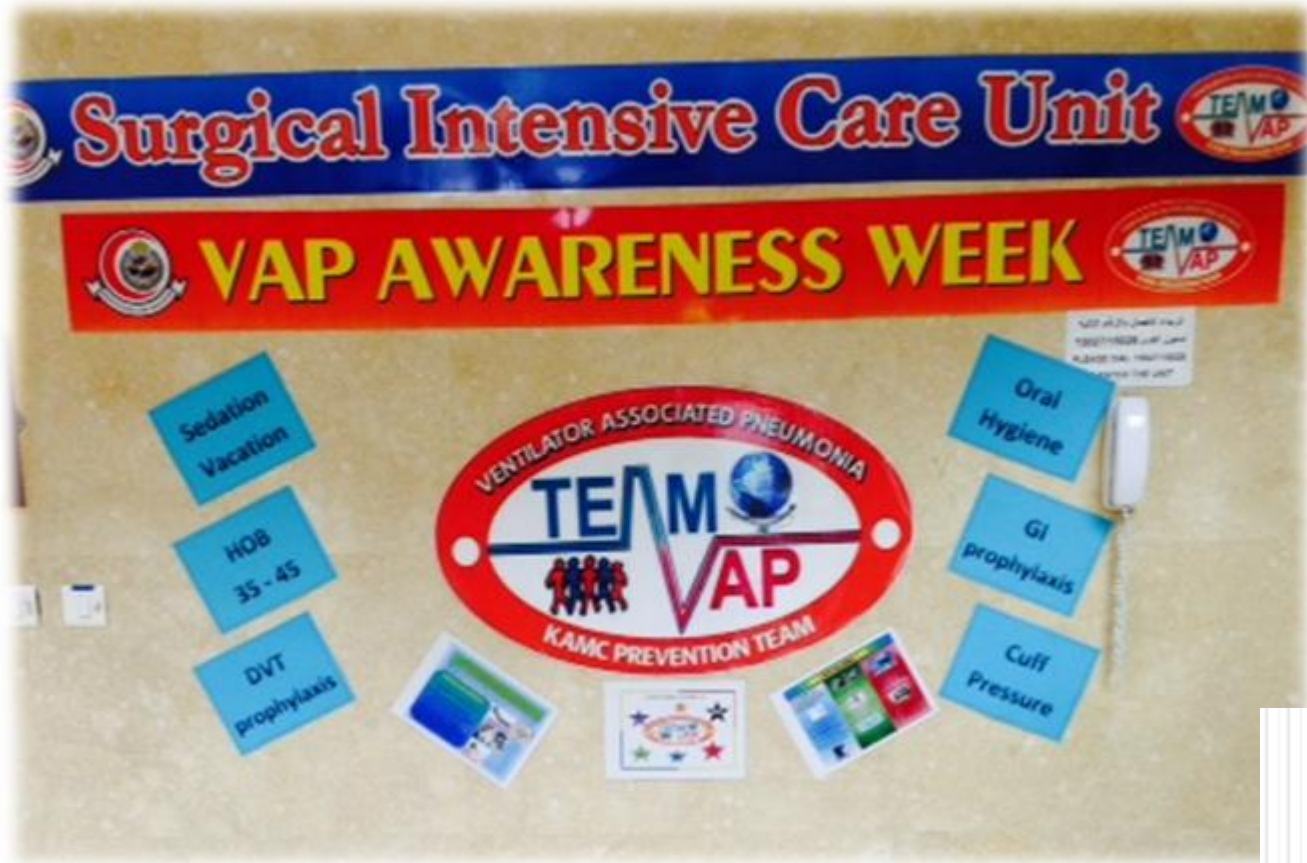

VAP Team Logo and Poster by SICU

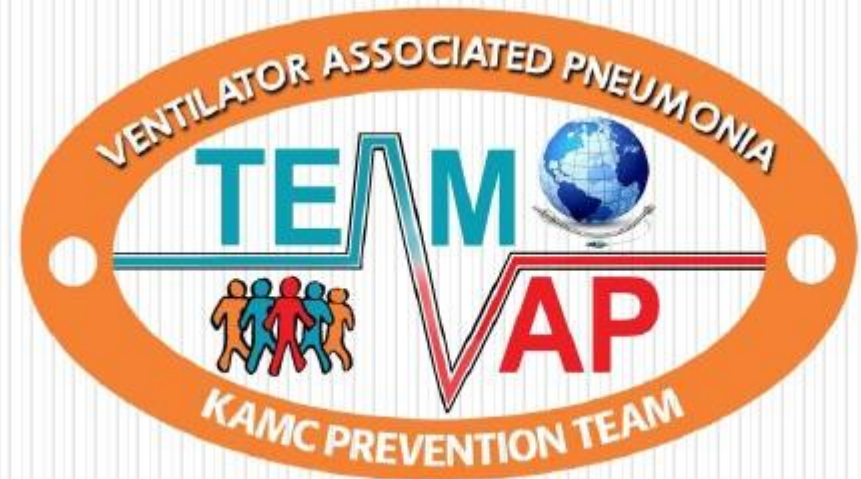

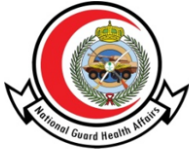

# King AbdulAziz Medical City

Central Region  
Quality Management Department

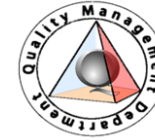

VAP DATA KIT -

VERS. 2

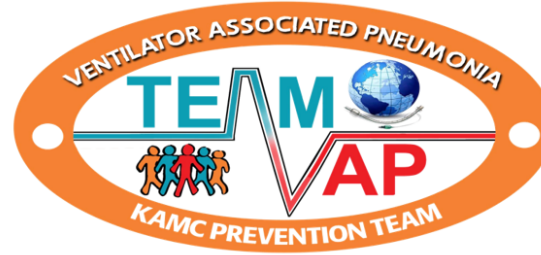

## Statement

This tool is developed to monitor the compliance of the VAP bundle in Critical Care Units.

**Audits should be done on Ventilated patients ONLY (via Tracheostomy or ET Tube)**

## Instructions:

1. Enter the date, shift (Day, Night, Weekend) and the MRN number of the patient reviewed. Data Collectors need to enter their Initials.
2. For each element of the bundle, choose from the drop down menu: YES for compliant and NO for non-compliance
3. Use the remarks field to enter the explanation for any N/A or NO item
4. Place NA for patients having any contraindication for **head of the bed elevation**: • Log Roll Protocol • Pelvic Fractures • Morbid Obesity & Elevation Impossibility • Prone Position • Active Resuscitation for MAP Below Target • Intra-aortic balloon pump • Spine unstable or not cleared
5. Mouth Care is done as observation of the patient mouth and verification of equipment use (Mouth care set)
6. **DVT Prophylaxis** is considered as **YES** in case of patient has at least (1) or (2):  
(1)- Mechanical Prophylaxis (*Ted Stockings, or Pneumatic sequential devices*), AND /OR (2)- Any pharmacological DVT prophylaxis (*Heparin, Enoxaparin...*)  
Contradictions for pharmacological DVT prophylaxis include: INR >2 / Platlets < 50 000 / PTT > 45 / Coagulopathy / Active Bleeding
7. This form will generate automatically the *individual bundle compliance* for each patient, *compliance for each element of the bundle*, and the *overall unit compliance*.

## Members of VAP Improvement Project :

|                                 |                                      |
|---------------------------------|--------------------------------------|
| Dr. Raymond Khan (Team Leader)  | Consultant, Intensive Care Unit      |
| Dr. Saeed Obbed                 | Staff Physician, Intensive Care Unit |
| Emma Querubin / Amal Al-Matroud | Acting Nurse Manager, ICU2           |
| Jude Amara                      | Interim Nurse Manager, IMCU          |
| Molly Mdlatshe                  | Acting - Nurse Manager               |

## Data Collection:

| Unit             | Frequency    | Total / Month                | Variability               |
|------------------|--------------|------------------------------|---------------------------|
| ICU2             | 3 times/week | 60 observations              | 1 day, 1 night, 1 weekend |
| IMCU             | 3 times/week | 60 observations              | 1 day, 1 night, 1 weekend |
| TICU, SICU, NCCU | 3 times/week | 100 % of Ventilated patients | 1 day, 1 night, 1 weekend |

VAP DATA KIT VER.2 ICU2 TICU SICU NCCU IMCU

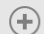

Screen Shot of the Data Collection Tool kit that was used by all units
